# Supplementary material
Source: PubMed Central journal article supplement (PMC6646108)
Supplement: NIHMS1010045-supplement-1.pdf [file NIHMS1010045-supplement-1.pdf]

**Online Supplemental Material 1: RDN Characteristics Survey**

Please complete the following questions to the best of your ability.

1) How many years have you been a Registered Dietitian/Registered Dietitian Nutritionist? Please round to the nearest whole number. \_\_\_\_\_years

2) How many years have you practiced in renal nutrition? Include time spent practicing with dialysis patients, chronic kidney disease patients, kidney transplant recipients, and acute care with a renal specialty. Please round to the nearest whole number. \_\_\_\_\_years

3) How many years have you worked for your current employer? Your employer might be a dialysis provider or a hospital/health care organization. Please round to the nearest whole number. \_\_\_\_\_years

4) How many years have you worked at the dialysis facility at which this observation is occurring? Please round to the nearest whole number. \_\_\_\_\_years

5) During a typical week, what is your work schedule at the facility at which this observation is occurring? Record the number of hours you work on each day during a typical week. For example, if you arrive at work around 9 and leave around 5 Monday, write 8 in the box. If you follow the same schedule but also do 2 hours of work at home in the evenings on Tuesdays to prepare patient education materials, write 10 in the box on Tuesday.

| Day of week                                                                  | Monday | Tuesday | Wednesday | Thursday | Friday | Saturday |
|------------------------------------------------------------------------------|--------|---------|-----------|----------|--------|----------|
| Hours physically present at dialysis facility where observation is occurring |        |         |           |          |        |          |

6) During a typical week, how many hours are you paid to work at the facility at which this observation is occurring? For example, you might be paid for 32 hours per week. Another way to think of this is the number of hours you are typically scheduled to work each week. \_\_\_\_\_hours per week typically paid at facility where observation is occurring

7) Do you typically work at any other dialysis facilities besides the one at which this observation is occurring?

- a) Yes → continue to question 8
- b) No → skip to question 9

8) How many hours per week are you typically paid to work at other dialysis facilities? Please provide a total for the week even if it is spread over multiple facilities. \_\_\_\_\_hours per week typically paid at other facilities.

- 9) What is the highest level of education you have completed?
- a) Bachelor's degree
  - b) Some Master's coursework completed but no degree received OR currently completing Master's coursework
  - c) Master's degree
  - d) Some doctoral coursework completed but no degree received OR currently completing doctoral coursework
  - e) Doctoral degree
- 10) Circle any specialty nutrition certifications you currently hold. Please do not include those that you are working towards or that you held previously but have lapsed.
- a) Board Certified Specialist in Renal Nutrition (CSR)
  - b) Board Certified Specialist in Gerontologic Nutrition (CSG)
  - c) Board Certified Specialist in Oncology Nutrition (CSO)
  - d) Board Certified Specialist in Pediatric Nutrition (CSP)
  - e) Board Certified Specialist in Sports Nutrition (CSSD)
  - f) Certified Nutrition Support Clinician (CNSC)
- 11) How many adult hemodialysis patients are cared for at the facility at which this observation is occurring? \_\_\_\_\_patients
- 12) Are there other RDNs (besides yourself) who are employed to see patients on a regular basis at the facility at which this observation is occurring?
- a) Yes → continue to question 13
  - b) No → skip to question 14
- 13) How many hours per week are other RDNs typically scheduled to work at this dialysis facility? Please provide a total for the week even if it is spread over multiple RDNs. \_\_\_\_\_other RDN hours per week at current facility.
- 14) Which of the following best describes the medical record system at the current facility?
- a) completely electronic
  - b) completely on paper
  - c) a combination of paper and electronic

continues

15) What nutrition protocols or policies are in place at this facility? For which of these protocols is the RDN responsible?

| Protocol                                                                 | Present at facility?<br>(Place an X for yes, leave blank for no) | RDN is primarily responsible for implementing protocol. (Place an X if true, leave blank if not true) | Other profession is primarily responsible for implementing protocol but RDN has some responsibility. (Place an X if true, leave blank if not true) |
|--------------------------------------------------------------------------|------------------------------------------------------------------|-------------------------------------------------------------------------------------------------------|----------------------------------------------------------------------------------------------------------------------------------------------------|
| Nutrition supplementation (oral, parenteral, during or between dialysis) |                                                                  |                                                                                                       |                                                                                                                                                    |
| Mineral bone disease treatment                                           |                                                                  |                                                                                                       |                                                                                                                                                    |
| Anemia management                                                        |                                                                  |                                                                                                       |                                                                                                                                                    |
| Dry weight protocol                                                      |                                                                  |                                                                                                       |                                                                                                                                                    |
| Hyperkalemia                                                             |                                                                  |                                                                                                       |                                                                                                                                                    |
| Hypercalcemia                                                            |                                                                  |                                                                                                       |                                                                                                                                                    |
| Dialysis adequacy                                                        |                                                                  |                                                                                                       |                                                                                                                                                    |
| Emergency Preparedness                                                   |                                                                  |                                                                                                       |                                                                                                                                                    |
| Weight management prior to transplant                                    |                                                                  |                                                                                                       |                                                                                                                                                    |

Thank you for completing this survey!

For investigator use only

|                                                                     | Observation 1 | Observation 2 | Observation 3 | Observation 4 |
|---------------------------------------------------------------------|---------------|---------------|---------------|---------------|
| Month                                                               |               |               |               |               |
| Date                                                                |               |               |               |               |
| Day of week                                                         |               |               |               |               |
| Time of observation                                                 |               |               |               |               |
| Week of calendar month (1-5)                                        |               |               |               |               |
| Week of lab cycle (1-5) <sup>a</sup>                                |               |               |               |               |
| Number of unique patients seen during day in face to face encounter |               |               |               |               |
| According to the RDN was this a typical day?                        |               |               |               |               |

a-week 1 is the week that the RDN gives the labs back to patients

**Online Supplemental Material 2:** Variable categories for with whom and with what the RDN interacted to complete the task, and whether the task occurred in a patient care area or elsewhere. This information was only gathered for the work related tasks; it was not gathered for non-work activities.

|                                                                                         |                                                                                                                                                                                                                                   |
|-----------------------------------------------------------------------------------------|-----------------------------------------------------------------------------------------------------------------------------------------------------------------------------------------------------------------------------------|
| <b>With whom</b> —mark any individuals with whom the RDN interacts to complete the task | Definition                                                                                                                                                                                                                        |
| Patient                                                                                 | Person receiving care at the dialysis center                                                                                                                                                                                      |
| Nurse(s)                                                                                | Includes RNs and LPNs employed at the dialysis center where the observation takes place or at another facility                                                                                                                    |
| Dialysis Provider(s)                                                                    | Includes MDs, DOs, NPs and PAs employed at the dialysis center where the observation takes place or at another facility/practice                                                                                                  |
| Dialysis Technician                                                                     | Person responsible for dialysis machine and patient care, measuring and recording clinical information, other medical assistant and phlebotomy patient care tasks                                                                 |
| Social worker                                                                           | Includes social workers employed at the dialysis center where the observation takes place or at another facility                                                                                                                  |
| Relative/Friend                                                                         | Person accompanying a patient at the dialysis center or providing care at home                                                                                                                                                    |
| Dietetic intern                                                                         | Individual training to become a RDN                                                                                                                                                                                               |
| Another RDN                                                                             | A RDN other than the individual being observed                                                                                                                                                                                    |
| Other                                                                                   | Includes facility administrators, secretaries, schedulers, pharmacists, insurance providers, nursing home staff, vendors, medication assistance programs, nutrition services providers, laboratory or other individual not listed |
| None                                                                                    | The task completed by the RDN did not require interaction with other individuals                                                                                                                                                  |
| <b>Tools used</b> —mark any tools that the RDN uses to complete the task                | Definition                                                                                                                                                                                                                        |
| Computer on wheels or tablet                                                            | A computer or device that is mobile, used to access electronic medical record or other software application                                                                                                                       |
| Desktop PC                                                                              | An immobile computer, used to access electronic medical record or other software application                                                                                                                                      |
| Phone                                                                                   | Telephone, either desktop or cellular                                                                                                                                                                                             |
| Pager                                                                                   | A one-way notification device                                                                                                                                                                                                     |
| Dialysis run sheet                                                                      | A portion of the medical record that relates to the patient's current treatment; usually kept at the chairside                                                                                                                    |
| None                                                                                    | No tools were required to complete the task                                                                                                                                                                                       |

| <b>Where—mark whether the task occurs in the patient care area or not</b> | Definition                                                                                       |
|---------------------------------------------------------------------------|--------------------------------------------------------------------------------------------------|
| Patient care area                                                         | The portion of the dialysis center where dialysis machines are located and patients receive care |

RN-registered nurse, LPN-licensed practical nurse, MD-medical doctor, DO-doctor of osteopathy, NP-nurse practitioner, PA-physician’s assistant, RDN-registered dietitian nutritionist, PC-personal computer
